# Supplementary material
Source: publisher site journal article supplement (https://www.dovepress.com/article/322276)
Supplement: Supplementary file 1 [file get_supplementary_file.php]

1 **Supplementary**

A

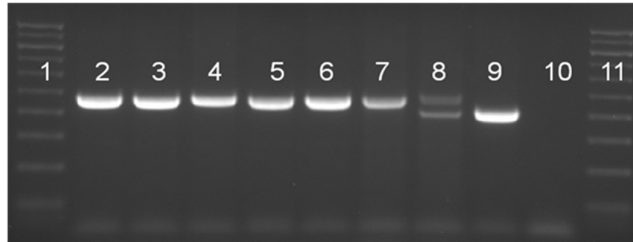

| slot | Sample                              |
|------|-------------------------------------|
| 1    | DNA ladder                          |
| 2    | Col1a1 <sup>Eng</sup> /- mouse      |
| 3    | Col1a1 <sup>Eng</sup> /- mouse      |
| 4    | Col1a1 <sup>Eng</sup> /- mouse      |
| 5    | Col1a1 <sup>Eng</sup> /- mouse      |
| 6    | Col1a1 <sup>Eng</sup> /- mouse      |
| 7    | Col1a1 <sup>Eng</sup> /-            |
| 8    | Col1a1 <sup>Eng</sup> /-            |
| 9    | WT                                  |
| 10   | H <sub>2</sub> O (Negative control) |
| 11   | DNA ladder                          |

B

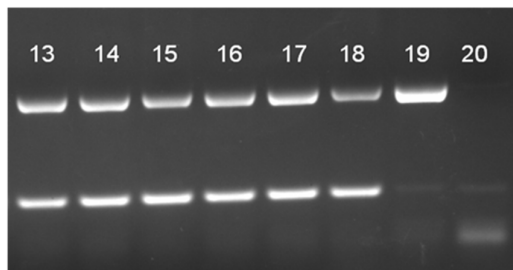

| slot | Sample                              |
|------|-------------------------------------|
| 13   | Col1a1 <sup>Eng</sup> /- mouse      |
| 14   | Col1a1 <sup>Eng</sup> /- mouse      |
| 15   | Col1a1 <sup>Eng</sup> /- mouse      |
| 16   | Col1a1 <sup>Eng</sup> /- mouse      |
| 17   | Col1a1 <sup>Eng</sup> /- mouse      |
| 18   | Col1a1 <sup>Eng</sup> /-            |
| 19   | Col1a1 <sup>Eng</sup> /-            |
| 20   | H <sub>2</sub> O (Negative control) |

2

3 **Supplementary figure 1:** Representative image of the genotyping performed for the presence

4 of endoglin floxed genes **(A)** and for expression of CRE **(B)** for all mice used in the experiments.

**A** Endoglin expression on human pancreatic cancer (tumor core)

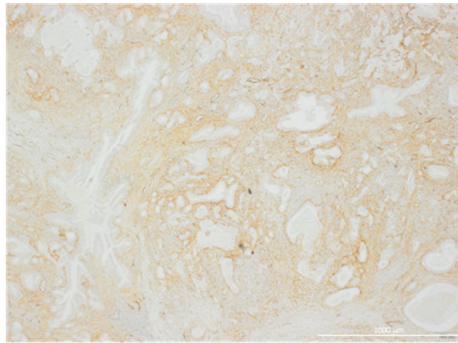

**B** Endoglin expression on human pancreatic cancer (tumor border)

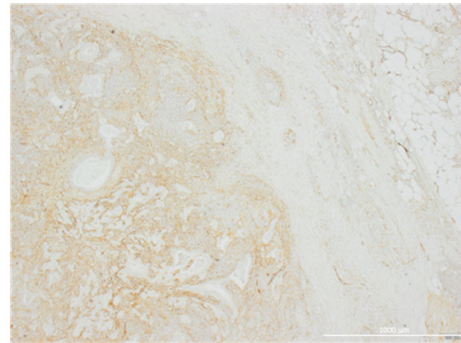

**C** Mouse Tissue (isotype endoglin)

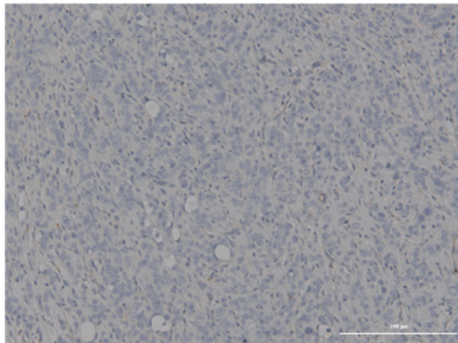

**D** Human Tissue (isotype endoglin)

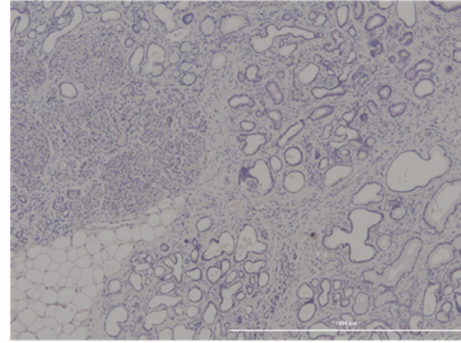

5

6 **Supplementary figure 2: A** Representative image of human endoglin expression on human  
7 pancreatic cancer tumor cores (n = 5). **B** Representative image of human endoglin expression  
8 on human pancreatic cancer tumor borders (n = 5). **C** Isotype control for endoglin staining on  
9 mouse pancreatic cancer tissue. **D** Isotype control for endoglin staining on human pancreatic  
10 cancer tissue.

### Endoglin Positive CAFs Score (IHC)

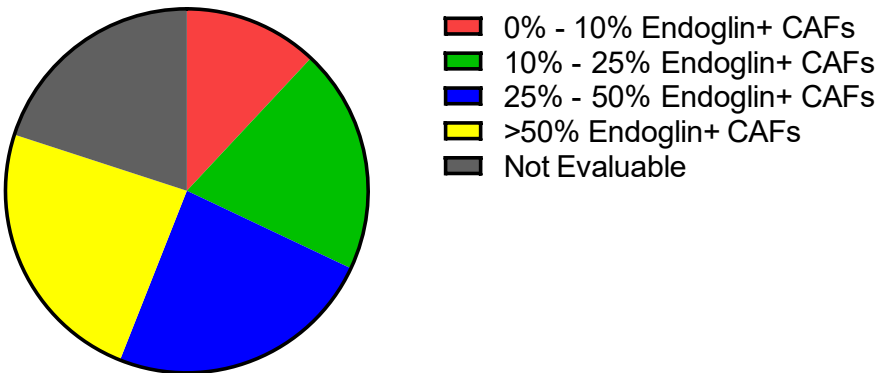

Total = 25 human pancreatic tumors

11

12 **Supplementary figure 3:** CAF-specific endoglin expression was scored on a scale of 1 to 4 ( 1: 0-  
13 10%; 2: 10%–25%; 3: 25%–50%, and 4: >50% endoglin positive CAFs vs total amount of CAFs) in  
14 a blinded manner by two independent observers.

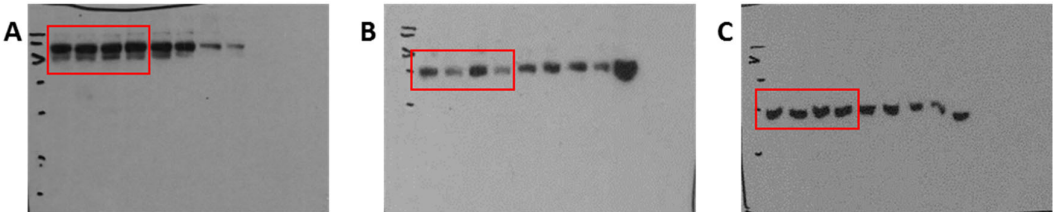

15

16 **Supplementary figure 4:** Full-length blot, the red borders indicate where the blot was cropped.  
17 **A** Endoglin protein expression on human pancreatic fibroblasts. **B** Basal and BMP9-induced  
18 downstream signaling (pSMAD1) was inhibited with TRC105. **C** Loading control (actin)

19

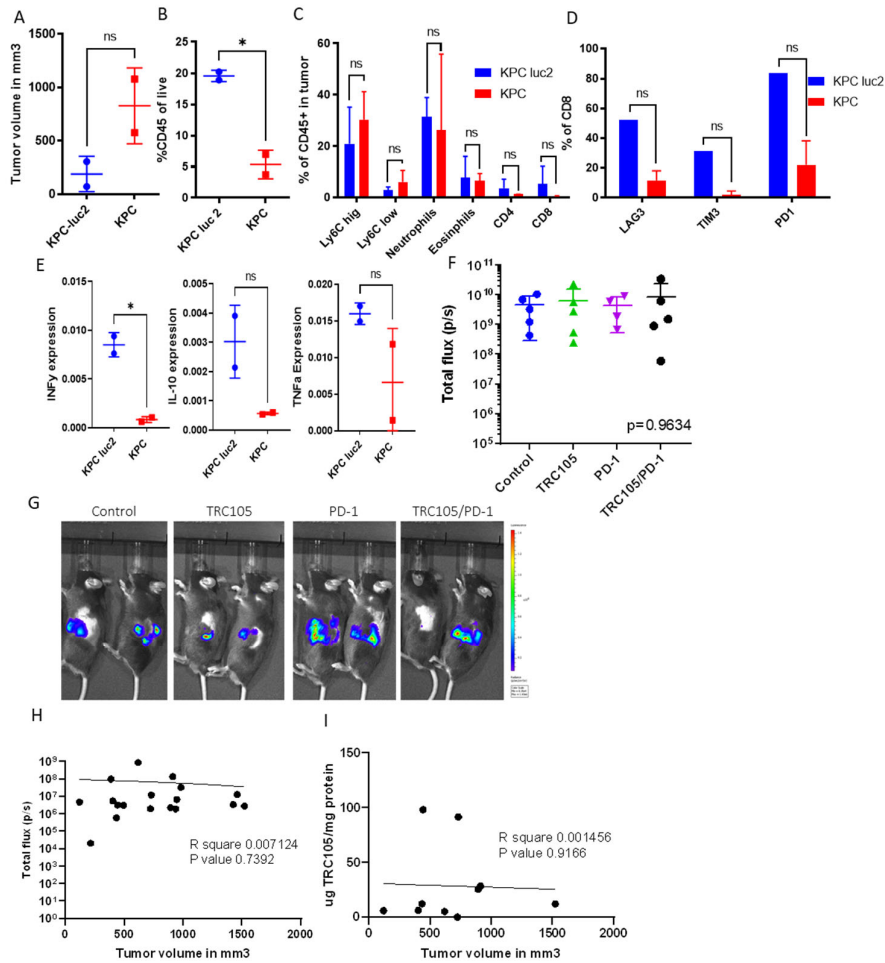

20 **Supplementary figure 5: A** Decreased tumor growth in the KPC-luc2 versus KPC parental cells,  
 21 accompanied by **B** increased CD45+ cells (n=2 mice per group). **C** Flow cytometry analysis on  
 22 different immune cell populations **D** Activation markers on CD8+ T-cells in the KPC-3-Luc2  
 23 versus KPC-3 (n=2 mice per group). **E** cytokine profile of the KPC-Luc2 versus KPC cells (n=2  
 24 mice per group). **A – E** Student T-test was performed to calculate differences indicated in the  
 25 graphs \*p<0.05 \*\*p<0.01. **F** Randomization of pancreatic tumors on bioluminescent signal,  
 26 (p=0.9634 by ANOVA, n=4-5 mice per group). **G** Representative bioluminescent pictures from  
 27 mice depicted in figure 3 . **H** No correlation between tumor volume and luciferase signal (n=18  
 28 mice linear regression was used to calculate the R square and P-value). **I** TRC105 accumulation  
 29 did not correlate with decreased tumor volume (n=7 mice linear regression was used to  
 30 calculate the R square and -value). All graphs represent mean +/- SD.

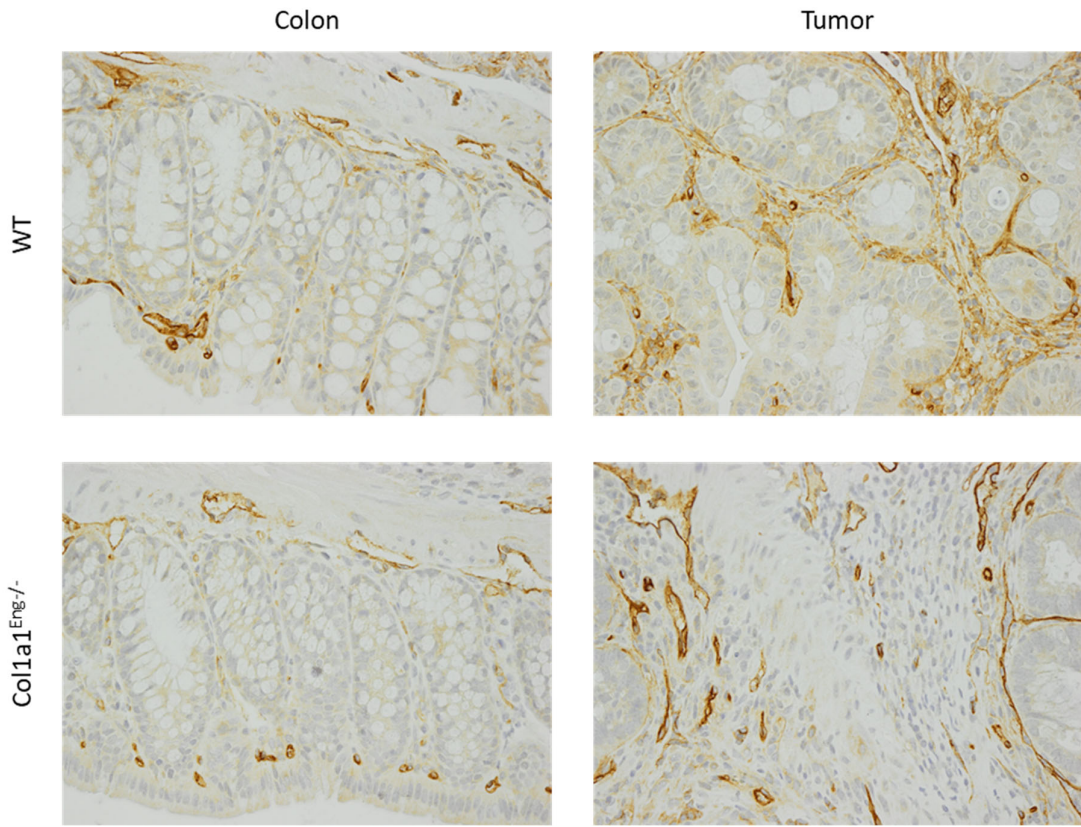

31 **Supplementary figure 6:** Images of endoglin expression by wild-type (upper panels) and  
32 Col1a1<sup>Eng</sup>/- (lower panels) mice in the colon (left panels) and in the colonic adenomas (right  
33 panels). The wild-type mice show endoglin expression on endothelial cells as well as  
34 fibroblasts. The Col1a1<sup>Eng</sup>/- mice only show endoglin expression on endothelial cells.

35

36

37

38

39

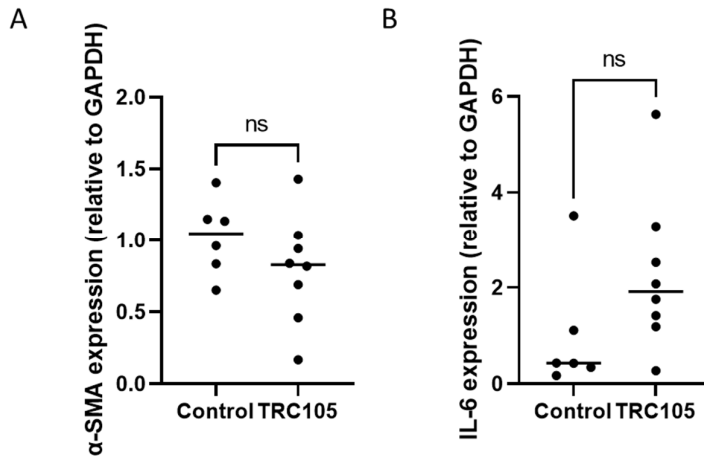

40

41 **Supplementary figure 7:**  $\alpha$ -SMA (A) and IL-6 (B) expression by TRC105 treated mice compared  
42 to the control group (n=5-8 mice per group).

43

44

45

46

47

48

49

50

51

52

53 **Supplementary table 1: Flow cytometry panel**

| <b>Epitope</b>        | <b>Fluorochrome</b> | <b>Manufacturer</b> |
|-----------------------|---------------------|---------------------|
| <b>CD3</b>            | V450                | eBioscience         |
| <b>CD4</b>            | Qdot605             | Biologend           |
| <b>CD8</b>            | Alexa 700           | BD Biosciences      |
| <b>CD45.2</b>         | APC-Cy7             | Thermo Fisher       |
| <b>Nk1.1</b>          | PE-Cy7              | Biologend           |
| <b>PD-1</b>           | FITCH               | Thermo Fisher       |
| <b>TIM3</b>           | APC                 | Thermo Fisher       |
| <b>LAG3</b>           | PE                  | Biologend           |
| <b>Life death</b>     | UV                  | Thermo Fisher       |
| <b>CD90.2</b>         | PE-cy7              | Biologend           |
| <b>CD326 (ep-CAM)</b> | PerCP-Cy5.5         | Biologend           |
| <b>CD45.2</b>         | APC-Cy7             | Invitrogen          |
| <b>Podoplanin</b>     | Alexa Fluor 488     | Biologend           |
| <b>CD31</b>           | APC                 | Invitrogen          |
| <b>Life death</b>     | UV                  | Thermo Fisher       |

54

55

56

57

58

59

60

61

62

63

64 **Supplementary table 2: RT-PCR primers**

| <b>Primer</b>     | <b>Forward 5'3' sequence</b> | <b>Reverse 5'3' sequence</b> |
|-------------------|------------------------------|------------------------------|
| <b>αSMA</b>       | GTCCCAGACATCAGGGAGTAA        | TCGGATACTTCAGCGTCAGGA        |
| <b>CD31</b>       | CTCCAACAGAGCCAGCAGTA         | GACCACTCCAATGACAACCA         |
| <b>CD45</b>       | GAGGTGTCTGATGGTGCAAG         | TGTATTCCACTAAAGCCTGATGAA     |
| <b>Endoglin</b>   | TGAATGGCAACCACGAGC           | GCAGGATGAGAATGGCGTC          |
| <b>Vimentin</b>   | TGGCACGTCTTGACCTTGAA         | GGTCATCGTGATGCTGAGAA         |
| <b>HGF</b>        | AAGAGTGGCATCAAATGCCAG        | CTGGATTGCTTGTGAAACACC        |
| <b>TGFβ1</b>      | CAACAATTCCTGGCGTTACC         | TGCTGTCACAAGAGCAGTGA         |
| <b>TGFβ2</b>      | CCGCCCACTTTCTACAGACCC        | GCGCTGGGTGGGAGATGTTAA        |
| <b>TGFβ3</b>      | GTTTGCAGCATTTGTGATCG         | TGCTCTGAGTGCTCCCTATG         |
| <b>VEGF</b>       | CACAGCAGATGTGAATGCAG         | TTTACACGTCTGCGGATCTT         |
| <b>BMP-9</b>      | CACTCCACTGAGATGTGCGT         | GCACAGCAAGCAGCCTATTC         |
| <b>FoxP3</b>      | CCCAGGAAAGACAGCAACCTT        | TTCTCACAACCAGGCCACTTG        |
| <b>Granzyme B</b> | ACTTTCGATCAAGGATCAGCA        | ACTGTCAGCTCAACCTCTTGT        |
| <b>IFNγ</b>       | GCTTTAACAGCAGGCCAGAC         | GGAAGCACCAAGGTGTCAAGT        |
| <b>IL-1β</b>      | AAGGGGACATTAGGCAGCAC         | ATGAAAGACCTCAGTGCGGG         |
| <b>IL-2</b>       | CACCCACTTCAAGCTCCACT         | AGGTCCATCAACAGCTGCTC         |
| <b>IL-4</b>       | AGATGGATGTGCCAAACGTCCTCA     | AATATGCGAAGCACCTTGGAAGCC     |
| <b>IL-5</b>       | ACCGAGCTCTGTTGACAAG          | TCCTCGCCACACTTCTCTTT         |
| <b>IL-6</b>       | GTATGAATAACGATGATGCACTTG     | ATGGTACTCCAGAAGACCAGAGGA     |
| <b>IL-8</b>       | CGGCAATGAAGCTTCTGTAT         | CCTTGAAACTCTTGCCTCA          |
| <b>IL-10</b>      | CCAGGGAGATCCTTTGATGA         | AACTGGCCACAGTTTTTCAGG        |
| <b>IL-12</b>      | GATGACATGGTGAAGACGGC         | AGGCACAGGGTCATCATCAA         |
| <b>IL-13</b>      | TGAGGAGCTGAGCAACATCACACA     | TGCGGTTACAGAGGCCATGCAATA     |
| <b>IL-15</b>      | GTGACTTTCATCCCAGTTGC         | TTCTTGCAGCCAGATTCTG          |
| <b>TNFα</b>       | TAGCCAGGAGGGAGAACAGA         | TTTTCTGGAGGCAGATGTGG         |
| <b>hEndoglin</b>  | CCGAGAGGTGCTTCTGGTCC         | GTGCAGTGGGATTCCCAGG          |
| <b>hβ-actin</b>   | GTTGTCGACGACGAGCG            | GCACAGAGCCTCGCCTT            |

65

66

67
